# Supplementary material
Source: ML conference proceedings conference paper supplement (https://openreview.net/forum?id=a6DteCxiw6)
Supplement: supplementary_material [file attachment]

---

# Supplementary Material

## Codec Avatar Studio: Paired Human Captures for Complete, Driveable, and Generalizable Avatars

---

Julieta Martinez<sup>1</sup>, Emily Kim<sup>2</sup>, Javier Romero<sup>1</sup>,  
Timur Bagautdinov<sup>1</sup>, Shunsuke Saito<sup>1</sup>, Shouo-I Yu<sup>1</sup>, Stuart Anderson<sup>1</sup>, Michael Zollhöfer<sup>1</sup>,  
Te-Li Wang<sup>1</sup>, Shaojie Bai<sup>1</sup>, Shih-En Wei<sup>1</sup>, Rohan Joshi<sup>1</sup>, Wyatt Borsos<sup>1</sup>,  
Tomas Simon<sup>1</sup>, Jason Saragih<sup>1</sup>, Paul Theodosis<sup>1</sup>, Alexander Greene<sup>1</sup>, Anjani Josyula<sup>1</sup>,  
Silvio Mano Maeta<sup>1</sup>, Andrew I. Jewett<sup>1</sup>, Simon Venshtain<sup>1</sup>, Christopher Heilman<sup>1</sup>,  
Yueh-Tung Chen<sup>1</sup>, Sidi Fu<sup>1</sup>, Mohamed Ezzeldin A. Elshaer<sup>1</sup>, Tingfang Du<sup>1</sup>, Longhua Wu<sup>1</sup>,  
Shen-Chi Chen<sup>1</sup>, Kai Kang<sup>1</sup>, Michael Wu<sup>1</sup>, Youssef Emad<sup>1</sup>, Steven Longay<sup>1</sup>, Ashley Brewer<sup>1</sup>,  
Hitesh Shah<sup>1</sup>, James Booth<sup>1</sup>, Taylor Koska<sup>1</sup>, Kayla Haidle<sup>1</sup>, Matt Andromalos<sup>1</sup>,  
Joanna Hsu<sup>1</sup>, Thomas Dauer<sup>1</sup>, Peter Selednik<sup>1</sup>, Tim Godisart<sup>1</sup>, Scott Ardisson<sup>1</sup>,  
Matthew Cipperly<sup>1</sup>, Ben Humberston<sup>1</sup>, Lon Farr<sup>1</sup>, Bob Hansen<sup>1</sup>, Peihong Guo<sup>1</sup>,  
Dave Braun<sup>1</sup>, Steven Krenn<sup>1</sup>, He Wen<sup>1</sup>, Lucas Evans<sup>1</sup>, Natalia Fadeeva<sup>1</sup>, Matthew Stewart<sup>1</sup>,  
Gabriel Schwartz<sup>1</sup>, Divam Gupta<sup>1</sup>, Gyeongsik Moon<sup>1</sup>, Kaiwen Guo<sup>1</sup>, Yuan Dong<sup>1</sup>,  
Yichen Xu<sup>1</sup>, Takaaki Shiratori<sup>1</sup>, Fabian Prada<sup>1</sup>, Bernardo R. Pires<sup>1</sup>, Bo Peng<sup>1</sup>,  
Julia Buffalini<sup>1</sup>, Autumn Trimble<sup>1</sup>, Kevyn McPhail<sup>1</sup>, Melissa Schoeller<sup>1</sup>,  
Yaser Sheikh<sup>1</sup>

<sup>1</sup>Codec Avatars Team, Meta Reality Labs Research

<sup>2</sup>Robotics Institute, Carnegie Mellon University

In this Supplementary Material we provide more details on our dataset and open source releases. We start with Ava-256, and continue with Goliath-4.

### 1 Ava-256

As promised in the main submission, we provide a comprehensive list of previous datasets compared with the Ava-256 in Table 1. We include smaller scale datasets first—those with fewer than 60 ids or less than 20 views, then larger-scale datasets, finally ours for comparison.

Table 1: Summary of multi-view face datasets. Smaller scale dataset (fewer than 60 ids or 20 views) as shown first, then large-scale datasets, then ours.

| Dataset name                               | IDs              | Views  | Sentences     |        | Resolution             | Size    | Headset captures |
|--------------------------------------------|------------------|--------|---------------|--------|------------------------|---------|------------------|
|                                            |                  |        | + expressions | Images |                        |         |                  |
| <i>D3DFACS</i> <sup>6</sup> [2]            | 10               | 6      | 19-97         | -      | 1 280 × 1 024          | -       | ✗                |
| <i>CMU Multi-PIE</i> [4]                   | 337              | 15     | 6             | 750K   | 3 072 × 2 048          | 0.3 TB  | ✗                |
| <i>4DFAB</i> <sup>3</sup> [1]              | 180              | 7      | 15            | -      | 1 600 × 1 200          | -       | ✗                |
| <i>MEAD</i> [8]                            | 48               | 7      | (8)           | -      | 1 920 × 1 080          | 0.9 TB  | ✗                |
| <i>Interdigital Light-Field</i> [7]        | 5                | 16     | -             | -      | 2 048 × 1 088          | 0.1 TB  | ✗                |
| <i>Multiface</i> [9]                       | 13               | 40/150 | 168           | 15M    | 2 048 × 1 334          | 65.0 TB | ✗                |
| <i>NerSemble</i> [5]                       | 222              | 16     | 25            | 31.7M  | 3 208 × 2 200          | 1.0 TB  | ✗                |
| <i>HUMBI Face</i> [12]                     | 617 <sup>1</sup> | 68     | 20            | 17.3M  | 200 × 150 <sup>5</sup> | 1.3 TB  | ✗                |
| <i>Facescape</i> [10]                      | 359 <sup>2</sup> | 68     | 20            | 400K   | 4 344 × 2 896          | 0.9 TB  | ✗                |
| <i>i3DMM</i> <sup>4</sup> [11]             | 64               | 137    | 10            | -      | -                      | -       | ✗                |
| <i>RenderMe-360</i> [6]                    | 500 <sup>3</sup> | 60     | 37/54         | 243M   | 2 448 × 2 048          | 5.8 TB  | ✗                |
| <b><i>Ava-256 Dome Captures (Ours)</i></b> | 256              | 80     | 35            | 217 M  | 2 048 × 1 334          | 32.0 TB | ✓                |

<sup>1</sup> We only found the data of 403 subjects available online. We have contacted the authors to clarify this discrepancy.

<sup>2</sup> Out of 847 total subjects captured, only 359 subjects are available with multi-view image data.

<sup>3</sup> 500 captures are expected to be released later this year, but only 21 subjects are currently available online. 5.8 TB is the size of this smaller subset containing about 4.2 % of the data, so we expect the final release size to be well over 100 TB.

<sup>4</sup> We requested access to the dataset on May 20th but have not heard back at the time of submission, and are thus unable to obtain more data about this dataset.

<sup>5</sup> The head images are cropped from the full-body 1 920 × 1 080 image, and are thus of low resolution.

<sup>6</sup> Dataset was not available on the website.

**Dataset documentation and intended uses.** We provide a dataset datasheet in the format proposed by Gebru et al. [3] at <https://github.com/facebookresearch/ava-256/blob/main/DATASHEET.md>.

**Dataset and code URL.** The URL for this dataset and associated code is <https://github.com/facebookresearch/ava-256>. The README.md file has instructions on how to download the data. We provide a simple python script (`download.py`) to download the entire dataset. The script can be customized to download only certain assets, or a subset of the captures.

**URL to Croissant metadata record.** We have chosen not to provide a Croissant metadata record for our dataset.

**Author statement.** The authors confirm that they bear responsibility in case of violation of rights. The authors also confirm that the code and data are released under the CC-by-NC 4.0 License.

**Hosting, licensing and maintenance plan.** Our dataset is hosted in a public S3 bucket in AWS. Please refer to `download.py`, our script which downloads all our data. The data, code and model weights are available under the CC-by-NC 4.0 License. Maintenance is done by the Codec Avatars Team at Reality Labs Research within Meta.

## 2 Goliath-4

**Dataset documentation and intended uses.** We provide a dataset datasheet in the format proposed by Gebru et al. [3] at <https://github.com/facebookresearch/goliath/blob/main/DATASHEET.md>.

**Dataset and code URL.** The URL for this dataset and associated code is <https://github.com/facebookresearch/goliath>.

**URL to Croissant.** We have chosen not to provide a Croissant metadata record for our dataset.

**Author statement.** The authors confirm that they bear responsibility in case of violation of rights. The authors also confirm that the code and data are released under the CC-by-NC 4.0 License.

**Hosting, licensing and maintenance plan.** Due to the sensitive nature of the minimally-clothed captures, this dataset is hosted at the moment as zips protected by password, and users should email javierromero1@meta and julietamartinez@meta.com to obtain access to the password.

We have uploaded the links to the full 4 TB dataset at <https://fb-baas-f32eacb9-8abb-11eb-b2b8-4857dd089e15.s3.amazonaws.com/goliath-for-review-full/index.html>.

To ease the job of reviewers, we provide a small sample with 100 frames of each capture, which can be used to run the baselines that we provide. The size of each small sample is less than 5 GB, and the combined size of all samples is only 39 GB. The links to download the smaller samples are available at <https://fb-baas-f32eacb9-8abb-11eb-b2b8-4857dd089e15.s3.amazonaws.com/goliath-for-review-100frames/index.html>.

The password for all the zip files is RLR-2015-2024.

The data, code and model weights are available under the CC-by-NC 4.0 License. Maintenance is done by the Codec Avatars Team at Reality Labs Research within Meta.

## References

- [1] S. Cheng, I. Kotsia, M. Pantic, and S. Zafeiriou. 4DFAB: A large scale 4D database for facial expression analysis and biometric applications. In *Proceedings of the IEEE/CVF Conference on Computer Vision and Pattern Recognition*, June 2018.
- [2] D. Cosker, E. Krumhuber, and A. Hilton. A FACS valid 3D dynamic action unit database with applications to 3D dynamic morphable facial modeling. In *Proceedings of the IEEE/CVF International Conference on Computer Vision*, pages 2296–2303, 11 2011. doi: 10.1109/ICCV.2011.6126510.
- [3] T. Gebru, J. Morgenstern, B. Vecchione, J. W. Vaughan, H. Wallach, H. D. Iii, and K. Crawford. Datasheets for datasets. *Communications of the ACM*, 64(12):86–92, 2021.
- [4] R. Gross, I. Matthews, J. Cohn, T. Kanade, and S. Baker. Multi-PIE. In *Proceedings of the IEEE International Conference on Automatic Face & Gesture Recognition*, pages 1–8, 2008. doi: 10.1109/AFGR.2008.4813399.
- [5] T. Kirschstein, S. Qian, S. Giebenhain, T. Walter, and M. Nießner. NeRsemble: Multi-view radiance field reconstruction of human heads. *ACM Transactions on Graphics*, 42(4), jul 2023. ISSN 0730-0301. doi: 10.1145/3592455. URL <https://doi.org/10.1145/3592455>.
- [6] D. Pan, L. Zhuo, J. Piao, H. Luo, W. Cheng, Y. Wang, S. Fan, S. Liu, L. Yang, B. Dai, Z. Liu, C. C. Loy, C. Qian, W. Wu, D. Lin, and K.-Y. Lin. RenderMe-360: Large digital asset library and benchmark towards high-fidelity head avatars. In *Thirty-seventh Conference on Neural Information Processing Systems Datasets and Benchmarks Track*, 2023.
- [7] N. Sabater, G. Boisson, B. Vandame, P. Kerbirou, F. Babon, M. Hog, T. Langlois, R. Gendrot, O. Bureller, A. Schubert, and V. Allie. Dataset and pipeline for multi-view light-field video. In *Proceedings of the IEEE/CVF Conference on Computer Vision and Pattern Recognition Workshops*, 2017.
- [8] K. Wang, Q. Wu, L. Song, Z. Yang, W. Wu, C. Qian, R. He, Y. Qiao, and C. C. Loy. Mead: A large-scale audio-visual dataset for emotional talking-face generation. In *Proceedings of the European Conference on Computer Vision*, 2020.
- [9] C.-h. Wu, N. Zheng, S. Ardisson, R. Bali, D. Belko, E. Brockmeyer, L. Evans, T. Godisart, H. Ha, X. Huang, A. Hypes, T. Koska, S. Krenn, S. Lombardi, X. Luo, K. McPhail, L. Millerschoen, M. Perdoch, M. Pitts, A. Richard, J. Saragih, J. Saragih, T. Shiratori, T. Simon, M. Stewart, A. Trimble, X. Weng, D. Whitewolf, C. Wu, S.-I. Yu, and Y. Sheikh. Multiface: A Dataset for Neural Face Rendering. In *arXiv*, 2022. doi: 10.48550/ARXIV.2207.11243. URL <https://arxiv.org/abs/2207.11243>.
- [10] H. Yang, H. Zhu, Y. Wang, M. Huang, Q. Shen, R. Yang, and X. Cao. FaceScope: A large-scale high quality 3D face dataset and detailed riggable 3D face prediction. In *Proceedings of IEEE/CVF Conference on Computer Vision and Pattern Recognition*, June 2020.

- [11] T. Yenamandra, A. Tewari, F. Bernard, H. Seidel, M. Elgharib, D. Cremers, and C. Theobalt. i3DMM: Deep implicit 3D morphable model of human heads. In *Proceedings of the IEEE/CVF Conference on Computer Vision and Pattern Recognition*, June 2021.
- [12] Z. Yu, J. S. Yoon, I. K. Lee, P. Venkatesh, J. Park, J. Yu, and H. S. Park. HUMBI: A large multiview dataset of human body expressions. In *Proceedings of IEEE/CVF Conference on Computer Vision and Pattern Recognition*, June 2020.
